# Supplementary material for: Evaluation of the age of landfill gas methane in landfill gas–natural gas mixtures using co-occurring constituents
Source: Royal Society of Chemistry journal article supplement (doi:10.1039/c3em30971a), 2013-01-01
Supplement: c3em30971a.xlsx [file c3em30971a.xlsx]

## Sheet: Sheet1
Device ID	Date Time	CH4 (Methane) (%)	CO2 (Carbon Dioxide) (%)	O2 (Oxygen) (%)	Balance Gas (%)	Relative Pressure ("H2O)	CH4/CO2
SIM06RD1	2010-04-20 07:55:46	38.4	1.1	3.2	57.3	7.5	34.9091
SIM06RD1	2010-04-01 11:10:37	31.5	0.9	6.2	61.4	1.29	35
SIM06RD1	2010-03-24 11:49:44	33.6	0.7	5.3	60.4	11.68	48
SIM06RD1	2010-02-19 10:33:11	10.7	1.6	16.5	71.2	-5.03	6.6875
SIM06RD1	2010-01-27 09:49:34	1.1	0.2	20.3	78.4	25.38	5.5
SIM06RD1	2009-11-18 07:57:46	10	1.7	16.6	71.7	-0.79	5.88235
SIM06RD1	2009-12-21 09:50:53	18.2	0.6	12.3	68.9	-4.44	30.3333
SIM06RD1	2009-11-16 12:36:05	9.7	1.4	16.2	72.7	0.42	6.92857
SIM06RD1	2009-10-23 09:08:00	0	0.2	19.6	80.2		0
SIM06RD1	2009-09-23 17:42:00	0.2	0.3	20.1			0.666667
SIM06RD1	2011-11-29 09:15:39	33	0.7	4.9	61.4	-0.05	47.1429
SIM06RD1	2011-12-19 09:57:30	41.6	0.9	1.4	56.1	-0.16	46.2222
SIM06RD1	2011-09-26 09:19:33	26.5	1.6	9.6	62.3	-0.02	16.5625
SIM06RD1	2011-10-26 09:13:42	25.9	0.9	9.2	64	-0.07	28.7778
SIM06RD1	2011-08-08 08:34:43	50.6	1.9	0	47.5	-0.37	26.6316
SIM06RD1	2011-07-25 08:38:16	49.4	1.7	0	48.9	-0.54	29.0588
SIM06RD1	2011-06-24 06:54:21	49	1.8	0	49.2	-0.24	27.2222
SIM06RD1	2011-05-12 08:36:09	46	1.4	0.7	51.9	0.91	32.8571
SIM06RD1	2011-04-28 12:51:06	38.1	1	3.8	57.1	-0.32	38.1
SIM06RD1	2011-03-24 07:34:29	46	1.5	0.7	51.8	-0.78	30.6667
SIM06RD1	2011-02-22 08:11:30	46.2	1.3	0.7	51.8	0.48	35.5385
SIM06RD1	2011-02-28 10:02:56	44.3	1.2	1.4	53.1	0.03	36.9167
SIM06RD1	2011-02-17 08:54:02	44.1	1.2	1.6	53.1	-0.01	36.75
SIM06RD1	2011-02-21 09:52:33	41.8	1.1	2.1	55	0.01	38
SIM06RD1	2011-01-07 16:34:30	34	0.6	5.5	59.9	0	56.6667
SIM06RD1	2011-01-14 16:47:09	37.3	0.6	4.2	57.9	0.02	62.1667
SIM06RD1	2011-01-18 14:04:51	35.8	0.5	4.6	59.1	0	71.6
SIM06RD1	2010-12-30 13:48:12	38.9	0.6	3.6	56.9	-0.07	64.8333
SIM06RD1	2011-01-26 13:18:26	41.5	0.8	2.4	55.3	-0.03	51.875
SIM06RD1	2010-10-28 13:32:28	55	1.6	0	43.4	-0.41	34.375
SIM06RD1	2010-11-12 09:53:37	0.5	0.1	20	79.4	0.16	5
SIM06RD1	2010-11-15 17:26:54	2.4	0.3	19.9	77.4	-0.08	8
SIM06RD1	2010-11-17 09:13:27	4.8	0.3	19.1	75.8	-0.04	16
SIM06RD1	2010-11-19 16:58:52	10.6	0.4	16.5	72.5	-0.01	26.5
SIM06RD1	2010-11-22 09:47:03	15.8	0.4	13.8	70	0	39.5
SIM06RD1	2010-11-24 10:49:19	26.8	0.3	9.5	63.4	-0.01	89.3333
SIM06RD1	2010-11-29 11:27:25	31	0.4	7.2	61.4	0	77.5
SIM06RD1	2010-10-29 08:29:04	47	3	2.3	47.7	-0.05	15.6667
SIM06RD1	2010-11-02 09:53:03	53.4	2.8	0.6	43.2	-1.17	19.0714
SIM06RD1	2010-11-03 08:11:08	0	0	20.9	79.1	-0.06	#DIV/0!
SIM06RD1	2010-11-03 08:18:48	0	0	20.8	79.2	-0.02	#DIV/0!
SIM06RD1	2010-11-03 14:34:48	0	0	20.5	79.5	0.17	#DIV/0!
SIM06RD1	2010-11-04 08:30:17	0	0	20.6	79.4	0	#DIV/0!
SIM06RD1	2010-11-05 14:05:21	0.7	0	17.9	81.4	-0.04	#DIV/0!
SIM06RD1	2010-11-08 09:42:39	0.4	0.1	20.8	78.7	-0.04	4
SIM06RD1	2010-11-10 08:52:15	0	0.1	20.6	79.3	-0.04	0
SIM06RD1	2010-12-01 08:51:47	0.6	0	21	78.4	-0.01	#DIV/0!
SIM06RD1	2010-12-03 13:13:16	36.1	0.3	5.3	58.3	0	120.333
SIM06RD1	2010-12-06 14:35:36	33.2	0.2	6.6	60	-0.95	166
SIM06RD1	2010-12-08 11:58:17	33.6	0.4	5.9	60.1	0	84
SIM06RD1	2010-12-10 17:39:23	34	0.5	6.2	59.3	-0.04	68
SIM06RD1	2010-12-15 13:02:36	32.8	0.7	6.1	60.4	-0.01	46.8571
SIM06RD1	2010-12-24 15:55:05	33.6	0.6	5.8	60	0.06	56
SIM06RD1	2010-12-27 13:06:01	35.3	0.5	5.2	59	0.05	70.6
SIM06RD1	2010-09-29 09:18:51	52.7	1.5	0	45.8	24.14	35.1333
SIM06RD1	2010-08-31 10:09:50	52.4	1.3	0	46.3	2.17	40.3077
SIM06RD1	2010-08-30 08:58:36	50.7	1.4	0	47.9	2.71	36.2143
SIM06RD1	2010-09-07 14:05:35	51.7	1.5	0	46.8	26.55	34.4667
SIM06RD1	2010-09-09 14:17:06	52.3	1.5	0	46.2	17.11	34.8667
SIM06RD1	2010-09-14 15:06:26	53.8	1.4	0	44.8	26.6	38.4286
SIM06RD1	2010-09-17 15:52:29	52.3	1.6	0	46.1	0.4	32.6875
SIM06RD1	2010-09-22 14:29:45	52.3	1.6	0	46.1	26.58	32.6875
SIM06RD1	2010-09-24 14:04:27	52.4	1.3	0	46.3	1.18	40.3077
SIM06RD1	2010-09-27 09:19:21	51.9	1.5	0	46.6	24.62	34.6
SIM06RD1	2010-10-28 14:45:48	49.7	1.7	0.1	48.5	-0.2	29.2353
SIM06RD1	2010-10-05 11:30:15	53.4	1.7	0	44.9	0.1	31.4118
SIM06RD1	2010-10-07 13:14:48	52.8	1.6	0	45.6	14.21	33
SIM06RD1	2010-10-11 12:29:36	52.7	1.4	0	45.9	4.18	37.6429
SIM06RD1	2010-10-12 13:40:06	53.7	1.6	0	44.7	1.06	33.5625
SIM06RD1	2010-10-14 14:36:41	53	1.6	0	45.4	30.29	33.125
SIM06RD1	2010-10-15 16:00:58	54.2	1.8	0	44	30.33	30.1111
SIM06RD1	2010-10-19 08:14:00	54.6	1.9	0	43.5	3.51	28.7368
SIM06RD1	2010-10-20 07:46:14	54.8	1.9	0	43.3	3.48	28.8421
SIM06RD1	2010-10-25 14:17:03	54.2	1.7	0	44.1	0.29	31.8824
SIM06RD1	2010-10-27 08:06:42	53.6	1.9	0	44.5	-0.63	28.2105
SIM06RD2	2011-12-19 10:29:21	29.4	0.1	1.7	68.8	-0.31	294
SIM06RD2	2011-11-29 09:20:02	11.1	1.3	14.9	72.7	-0.16	8.53846
SIM06RD2	2011-05-12 08:46:52	37.2	0.1	1.9	60.8	1.34	372
SIM06RD2	2011-06-24 06:56:18	43.1	0.1	0	56.8	-0.16	431
SIM06RD2	2011-07-25 08:49:05	43.3	0.1	1.9	54.7	-0.39	433
SIM06RD2	2011-08-08 08:47:01	48.9	0.1	0.2	50.8	-0.7	489
SIM06RD2	2011-09-26 09:22:44	10.6	1.6	16.6	71.2	-0.54	6.625
SIM06RD2	2011-10-26 09:17:59	9.4	1.4	16.5	72.7	-0.16	6.71429
SIM06RD2	2010-10-28 13:41:06	57	0	0	43	-0.01	#DIV/0!
SIM06RD2	2010-10-29 08:26:20	0	0	21.1	78.9	-0.39	#DIV/0!
SIM06RD2	2010-10-29 08:30:53	0	0	21.1	78.9	-0.01	#DIV/0!
SIM06RD2	2010-10-28 13:28:41	57.2	0	0	42.8	0.02	#DIV/0!
SIM06RD2	2010-10-28 14:49:04	51.8	0	0.1	48.1	-0.8	#DIV/0!
SIM06RD2	2010-11-15 17:29:46	2.8	0.3	20	76.9	-0.1	9.33333
SIM06RD2	2010-11-12 09:55:52	2.1	0.2	19.6	78.1	-0.03	10.5
SIM06RD2	2010-11-10 08:54:44	1	0.2	20.2	78.6	-0.04	5
SIM06RD2	2010-11-08 09:39:43	1.6	0.2	20.4	77.8	-0.02	8
SIM06RD2	2010-11-05 14:03:44	0.5	0	17.9	81.6	1.76	#DIV/0!
SIM06RD2	2010-11-03 14:39:51	57.2	0	0	42.8	0.48	#DIV/0!
SIM06RD2	2010-11-04 08:27:51	0	0	20.6	79.4	-0.03	#DIV/0!
SIM06RD2	2010-11-03 08:24:54	58.5	0	0	41.5	0.17	#DIV/0!
SIM06RD2	2010-11-02 09:57:30	61	0	0	39	-0.34	#DIV/0!
SIM06RD2	2010-11-29 11:34:12	10.8	0.3	16.1	72.8	-0.01	36
SIM06RD2	2010-11-24 10:53:29	4.8	0.3	19.8	75.1	-0.01	16
SIM06RD2	2010-11-22 09:49:07	3.7	0.4	18.8	77.1	-0.01	9.25
SIM06RD2	2010-11-19 17:01:11	3.2	0.4	19.7	76.7	-0.03	8
SIM06RD2	2010-11-17 09:15:54	3.4	0.4	19.8	76.4	-0.04	8.5
SIM06RD2	2010-12-24 15:58:00	22.7	0.3	10.3	66.7	-0.03	75.6667
SIM06RD2	2010-12-15 13:04:11	22.4	0.5	10.1	67	-0.09	44.8
SIM06RD2	2010-12-10 17:42:30	26.2	0.1	8.8	64.9	-0.1	262
SIM06RD2	2010-12-08 12:00:52	24.4	0	9	66.6	-0.08	#DIV/0!
SIM06RD2	2010-12-06 14:37:52	23.3	0	10.1	66.6	0	#DIV/0!
SIM06RD2	2010-12-03 13:17:43	26.1	0	8.9	65	-0.08	#DIV/0!
SIM06RD2	2010-12-01 08:50:44	25.2	0.1	9.8	64.9	-3.58	252
SIM06RD2	2010-12-27 13:02:32	26	0.1	8.4	65.5	-0.01	260
SIM06RD2	2011-01-14 16:50:13	23.7	0.1	8.9	67.3	-0.06	237
SIM06RD2	2011-01-07 16:36:24	22.4	0.1	9.8	67.7	-0.07	224
SIM06RD2	2010-12-30 13:55:23	27.7	0.1	7.5	64.7	1.05	277
SIM06RD2	2011-01-18 14:09:00	26.4	0	6.7	66.9	-0.01	#DIV/0!
SIM06RD2	2011-01-26 13:28:27	30.3	0.1	5.3	64.3	-0.07	303
SIM06RD2	2011-02-21 09:58:41	29.9	0.1	4	66	-0.02	299
SIM06RD2	2011-02-17 08:59:00	26.4	0.2	6.5	66.9	-0.04	132
SIM06RD2	2011-04-28 12:55:25	28.5	0.1	5.8	65.6	-0.44	285
SIM06RD2	2011-02-22 08:16:11	33.3	0.1	2.5	64.1	-0.07	333
SIM06RD2	2011-03-24 07:43:37	36.3	0.2	1.2	62.3	-0.9	181.5
SIM06RD2	2011-02-28 10:06:09	31.3	0.1	3.2	65.4	-0.07	313
SIM06RD2	2010-05-20 13:06:23	48.2	0	0	51.8	2.51	#DIV/0!
SIM06RD2	2010-05-13 11:42:09	44.5	0	0.2	55.3	-2.16	#DIV/0!
SIM06RD2	2010-04-29 13:20:24	18.3	0.8	10.6	70.3	27.28	22.875
SIM06RD2	2010-04-19 15:54:17	11	1	15.4	72.6	2.44	11
SIM06RD2	2010-04-20 08:04:44	23.8	0.7	8.6	66.9	9.11	34
SIM06RD2	2010-04-13 10:52:25	12.5	0.8	13.1	73.6	32.43	15.625
SIM06RD2	2010-04-01 11:15:06	17.3	0.9	10.6	71.2	-0.19	19.2222
SIM06RD2	2010-07-19 14:08:28	53.3	0	0	46.7	2.62	#DIV/0!
SIM06RD2	2010-07-30 10:41:03	51	0.1	1.2	47.7	3.43	510
SIM06RD2	2010-08-03 09:42:00	53.4	0	0	46.6	22.41	#DIV/0!
SIM06RD2	2010-08-12 13:07:39	57	0	0.1	42.9	18.78	#DIV/0!
SIM06RD2	2010-06-25 11:36:32	52.2	0	0	47.8	11.24	#DIV/0!
SIM06RD2	2010-06-11 08:37:09	51.5	0	0	48.5	2.24	#DIV/0!
SIM06RD2	2010-05-21 12:15:50	49.2	0	0	50.8	2.2	#DIV/0!
SIM06RD2	2010-06-18 15:55:30	52.2	0	0	47.8	11.37	#DIV/0!
SIM06RD2	2010-08-27 14:13:13	57.8	0	0	42.2	2.81	#DIV/0!
SIM06RD2	2010-08-25 14:12:06	57.6	0	0	42.4	14.06	#DIV/0!
SIM06RD2	2010-08-20 16:29:11	57	0	0	43	2.4	#DIV/0!
SIM06RD2	2010-09-22 14:36:01	60.7	0.1	0	39.2	26.16	607
SIM06RD2	2010-09-17 15:57:52	60.7	0	0	39.3	0.33	#DIV/0!
SIM06RD2	2010-09-09 14:21:27	60.6	0	0	39.4	13.22	#DIV/0!
SIM06RD2	2010-09-14 15:12:58	62.2	0	0	37.8	26.23	#DIV/0!
SIM06RD2	2010-09-07 14:13:45	60.7	0	0	39.3	29.08	#DIV/0!
SIM06RD2	2010-08-30 09:04:22	57.7	0	0	42.3	2.96	#DIV/0!
SIM06RD2	2010-08-31 10:13:17	59.5	0	0	40.5	3.44	#DIV/0!
SIM06RD2	2010-09-27 09:25:44	59.5	0	0	40.5	24.06	#DIV/0!
SIM06RD2	2010-09-24 14:10:27	60.3	0	0	39.7	1.03	#DIV/0!
SIM06RD2	2010-10-05 11:38:03	62.2	0	0	37.8	0	#DIV/0!
SIM06RD2	2010-10-07 13:19:20	60.6	0	0	39.4	14.5	#DIV/0!
SIM06RD2	2010-09-29 09:24:56	58.6	0	0	41.4	24.46	#DIV/0!
SIM06RD2	2010-10-27 08:10:42	60.4	0	0	39.6	-0.65	#DIV/0!
SIM06RD2	2010-10-25 14:23:06	59.8	0	0	40.2	0.27	#DIV/0!
SIM06RD2	2010-10-20 07:49:37	64	0.1	0	35.9	3.95	640
SIM06RD2	2010-10-19 08:19:39	63.8	0.1	0	36.1	3.46	638
SIM06RD2	2010-10-15 16:04:39	63.1	0	0	36.9	30.28	#DIV/0!
SIM06RD2	2010-10-14 14:45:06	61.7	0	0	38.3	30.22	#DIV/0!
SIM06RD2	2010-10-11 12:35:41	61	0	0	39	4.22	#DIV/0!
SIM06RD2	2010-10-12 13:43:46	62	0	0	38	0.8	#DIV/0!
SIM06RD2	2010-01-27 09:51:25	0	0	20.5	79.5	23.19	#DIV/0!
SIM06RD2	2010-02-19 10:35:59	22.3	0.9	9.5	67.3	2.62	24.7778
SIM06RD2	2010-03-24 11:50:55	16.8	0.4	11.5	71.3	11.8	42
SIM06RD2	2009-11-18 07:59:49	0.1	0	20.9	79	-0.8	#DIV/0!
SIM06RD2	2009-12-21 09:53:57	0.2	0.1	20.3	79.4	-2.28	2
SIM06RD2	2009-10-23 08:09:00	0	0	20.1	79.9		#DIV/0!
SIM06RD2	2009-11-16 12:38:23	7.1	1	17.5	74.4	0.47	7.1
SIM06RD2	2009-09-23 17:40:00	0.1	0.1	20.1			1
SIM07RD1	2009-09-23 17:45:00	4	0.4	16.7			10
SIM07RD1	2009-11-16 12:17:12	0	0	20.3	79.7	0.33	#DIV/0!
SIM07RD1	2009-11-05 16:59:13	0.3	0	20.9	78.8	8.76	#DIV/0!
SIM07RD1	2009-10-23 08:59:00	3.1	0.4	17.2	79.3		7.75
SIM07RD1	2009-12-21 09:32:26	0.2	0.1	20.3	79.4	-4.94	2
SIM07RD1	2009-11-18 07:24:42	0.2	0	21.3	78.5	-0.73	#DIV/0!
SIM07RD1	2010-03-24 12:18:31	8.3	0	16.6	75.1	11.53	#DIV/0!
SIM07RD1	2010-04-01 10:55:49	14.7	0.7	8.4	76.2	1.44	21
SIM07RD1	2010-02-19 10:09:18	4.6	0.8	11.8	82.8	-13.12	5.75
SIM07RD1	2010-01-27 09:33:10	6.3	0.3	18.2	75.2	25.42	21
SIM07RD1	2010-10-15 16:11:36	0.5	0.5	17.4	81.6	30.4	1
SIM07RD1	2010-09-29 09:33:35	0.5	0.7	14.4	84.4	24.3	0.714286
SIM07RD1	2010-08-12 13:52:06	0.3	0.7	14	85	11.25	0.428571
SIM07RD1	2010-08-20 16:36:35	0.6	1	11.8	86.6	2.1	0.6
SIM07RD1	2010-08-27 14:20:12	0.7	0.7	14.7	83.9	3.34	1
SIM07RD1	2010-08-30 08:09:08	0.2	0.5	17.2	82.1	3.81	0.4
SIM07RD1	2010-06-18 16:02:31	0.7	0.5	14.9	83.9	13.27	1.4
SIM07RD1	2010-06-11 08:46:20	0.8	1.1	13	85.1	1.87	0.727273
SIM07RD1	2010-06-25 07:12:26	0.6	0.9	14.6	83.9	15.06	0.666667
SIM07RD1	2010-08-03 10:33:00	0.4	0.7	11.6	87.3	22.4	0.571429
SIM07RD1	2010-07-30 10:50:40	0.4	0.4	15.6	83.6	3.45	1
SIM07RD1	2010-07-19 14:15:34	0.8	0.6	12.9	85.7	2.71	1.33333
SIM07RD1	2010-04-16 17:15:37	2.4	0.3	16.6	80.7	31.91	8
SIM07RD1	2010-04-20 08:50:13	5	1.7	7.7	85.6	8.59	2.94118
SIM07RD1	2010-04-29 13:33:50	1.1	0.4	16.4	82.1	26.66	2.75
SIM07RD1	2010-05-20 13:44:03	0.7	0.4	15.3	83.6	0.71	1.75
SIM07RD1	2010-05-13 11:56:41	1.4	0.9	11.8	85.9	-0.59	1.55556
SIM07RD1	2010-05-21 07:32:24	0.8	0.8	15.2	83.2	2.98	1
SIM07RD1	2011-03-24 07:54:07	0.2	0.2	20	79.6	-0.27	1
SIM07RD1	2011-04-28 13:02:04	0.6	0.3	16	83.1	-0.03	2
SIM07RD1	2011-01-26 13:42:21	0.2	0.2	18.9	80.7	0.19	1
SIM07RD1	2011-02-22 07:45:11	1.6	1.1	13.9	83.4	-0.23	1.45455
SIM07RD1	2010-12-30 14:06:29	0.8	0.4	17.6	81.2	0.13	2
SIM07RD1	2010-11-29 15:27:02	0	0	20.9	79.1	-0.2	#DIV/0!
SIM07RD1	2010-11-10 09:03:23	0.5	1	14.4	84.1	-0.01	0.5
SIM07RD1	2010-10-27 08:27:41	0.4	0.9	15.4	83.3	-0.51	0.444444
SIM07RD1	2010-10-28 15:04:35	0.1	0.1	19.5	80.3	0.11	1
SIM07RD1	2011-10-26 09:28:32	0.6	0.7	16.4	82.3	-0.06	0.857143
SIM07RD1	2011-11-29 08:16:55	0.6	0.7	16.3	82.4	-0.01	0.857143
SIM07RD1	2011-09-26 09:29:56	0.9	0.9	15.6	82.6	0.26	1
SIM07RD1	2011-08-08 08:09:38	0.9	0.9	15.3	82.9	0.15	1
SIM07RD1	2011-07-25 08:11:24	0.5	0.4	17.5	81.6	0.07	1.25
SIM07RD1	2011-06-24 09:21:32	1.1	0.1	18.1	80.7	-0.02	11
SIM07RD1	2011-05-12 08:55:53	0.4	0.1	19.3	80.2	0.45	4
SIM07RD1	2011-12-19 09:14:15	2.3	0.9	17.6	79.2	-0.11	2.55556
SIM07RD2	2011-02-22 07:50:35	1.7	0.2	17.6	80.5	-0.15	8.5
SIM07RD2	2011-03-24 07:56:05	0.4	0.1	20.2	79.3	-0.15	4
SIM07RD2	2011-04-28 13:03:43	0.7	0	18.1	81.2	-0.05	#DIV/0!
SIM07RD2	2011-05-12 08:57:31	0.7	0	19.9	79.4	-0.02	#DIV/0!
SIM07RD2	2011-06-24 09:23:13	0.9	1	14	84.1	-0.02	0.9
SIM07RD2	2011-07-25 08:13:05	0.6	0.1	19.1	80.2	0	6
SIM07RD2	2011-08-08 08:11:27	1.1	0.1	18.9	79.9	0	11
SIM07RD2	2011-10-26 09:29:53	0.6	0.1	19.8	79.5	-0.05	6
SIM07RD2	2011-09-26 09:31:22	1.3	0.1	19.3	79.3	0.27	13
SIM07RD2	2011-12-19 09:16:41	1.7	0.3	19.9	78.1	-0.11	5.66667
SIM07RD2	2011-11-29 08:18:57	0.5	0.1	19.3	80.1	0	5
SIM07RD2	2009-09-23 17:44:00	4.7	0.3	17.1			15.6667
SIM07RD2	2009-10-23 08:59:00	3.8	0.2	16.9	79.1		19
SIM07RD2	2009-11-16 12:21:08	1.3	0	19.3	79.4	0.36	#DIV/0!
SIM07RD2	2009-12-21 09:35:59	0.1	0	20.5	79.4	-2.22	#DIV/0!
SIM07RD2	2009-11-18 07:28:13	0.4	0	21.3	78.3	-0.72	#DIV/0!
SIM07RD2	2010-01-27 09:36:44	3.8	0.2	19.4	76.6	25.09	19
SIM07RD2	2010-02-19 10:15:26	13.5	0.3	13	73.2	-1.2	45
SIM07RD2	2010-03-24 12:20:38	12.6	0	14.3	73.1	12.31	#DIV/0!
SIM07RD2	2010-04-01 10:59:38	14.2	0.1	13.1	72.6	-0.71	142
SIM07RD2	2010-04-20 09:01:47	14.8	0.2	11.5	73.5	8.37	74
SIM07RD2	2010-04-16 17:17:04	3.8	0	18.3	77.9	31.42	#DIV/0!
SIM07RD2	2010-05-13 12:09:48	10.1	0.1	13.2	76.6	0.87	101
SIM07RD2	2010-04-29 13:35:50	1.4	0	18.9	79.7	27.63	#DIV/0!
SIM07RD2	2010-08-27 14:21:29	1.7	0.1	18.7	79.5	2.3	17
SIM07RD2	2010-08-20 16:38:46	2.2	0	17.4	80.4	2.36	#DIV/0!
SIM07RD2	2010-08-12 13:54:17	1.3	0	18.2	80.5	19.27	#DIV/0!
SIM07RD2	2010-08-03 10:41:00	1.5	0	18.4	80.1	26.28	#DIV/0!
SIM07RD2	2010-06-18 16:04:07	1.5	0	18.4	80.1	12.81	#DIV/0!
SIM07RD2	2010-06-11 08:48:43	2	0.1	19	78.9	2.05	20
SIM07RD2	2010-05-20 13:46:01	0.4	0	19.5	80.1	2.26	#DIV/0!
SIM07RD2	2010-05-21 07:35:52	0.7	0	20	79.3	2	#DIV/0!
SIM07RD2	2010-07-30 10:52:28	1.1	0	18.5	80.4	3.78	#DIV/0!
SIM07RD2	2010-07-19 14:16:44	1.6	0	17.5	80.9	2.59	#DIV/0!
SIM07RD2	2010-06-25 07:14:11	1.4	0.1	19.1	79.4	14.34	14
SIM07RD2	2010-10-27 08:30:21	1.1	0.1	19.2	79.6	-0.88	11
SIM07RD2	2010-10-15 16:13:23	0.8	0.1	19.8	79.3	30.3	8
SIM07RD2	2010-09-29 09:34:52	1.2	0.1	18.4	80.3	21.85	12
SIM07RD2	2010-08-30 08:10:35	0.7	0.1	19.2	80	2.21	7
SIM07RD2	2010-11-29 15:28:49	0.1	0	20.8	79.1	0.01	#DIV/0!
SIM07RD2	2010-11-10 09:05:44	1.1	0.1	18.5	80.3	-0.03	11
SIM07RD2	2010-10-28 15:06:05	0.2	0	20.2	79.6	0.09	#DIV/0!
SIM07RD2	2011-01-26 13:46:42	0.4	0	20.2	79.4	0.37	#DIV/0!
SIM07RD2	2010-12-30 14:07:44	1.1	0	19.7	79.2	0.25	#DIV/0!
SIM006RM	2011-11-29 09:07:13	53.3	6.6	0.7	39.4	-0.02	8.07576
SIM006RM	2011-12-19 09:37:00	49.7	6.9	1.9	41.5	-0.11	7.2029
SIM006RM	2011-05-12 08:23:41	48.1	8.7	1.7	41.5	1.06	5.52874
SIM006RM	2011-06-24 06:41:41	55.4	6.7	0	37.9	-0.03	8.26866
SIM006RM	2011-07-25 08:24:08	55.8	8.6	0	35.6	-0.29	6.48837
SIM006RM	2011-08-08 08:24:19	56.4	6.8	0	36.8	-0.45	8.29412
SIM006RM	2011-09-26 09:15:16	56.7	6.6	0	36.7	-0.19	8.59091
SIM006RM	2011-10-26 09:05:59	57.7	7.7	0	34.6	-0.05	7.49351
SIM006RM	2010-10-28 14:41:53	24.6	6	9.1	60.3	0	4.1
SIM006RM	2010-10-28 13:18:30	25.8	6.3	9	58.9	-0.37	4.09524
SIM006RM	2010-10-28 13:24:36	27.1	6	8.7	58.2	-0.14	4.51667
SIM006RM	2010-10-29 08:38:15	5.6	0.7	18.9	74.8	0	8
SIM006RM	2010-11-02 10:01:58	5.6	2.1	17.9	74.4	-0.74	2.66667
SIM006RM	2010-11-03 08:16:33	3.6	2	18.7	75.7	0	1.8
SIM006RM	2010-11-03 14:37:13	2.1	1	18.9	78	0.22	2.1
SIM006RM	2010-11-04 08:34:12	3.3	0.6	18.9	77.2	0	5.5
SIM006RM	2010-11-05 14:07:14	3	0.4	16.9	79.7	0.07	7.5
SIM006RM	2010-11-08 09:48:18	41	4.8	4.1	50.1	0	8.54167
SIM006RM	2010-11-10 08:50:13	53.6	4.5	0.3	41.6	0	11.9111
SIM006RM	2010-11-12 09:51:35	51.9	4.3	1.4	42.4	0	12.0698
SIM006RM	2010-11-15 17:24:44	11.2	1.9	16.2	70.7	0.01	5.89474
SIM006RM	2010-11-29 11:20:23	1.3	3	19.6	76.1	-0.02	0.433333
SIM006RM	2010-11-17 09:09:13	51.1	6.3	0.7	41.9	0	8.11111
SIM006RM	2010-11-19 16:55:29	51.2	6.1	0.6	42.1	0.01	8.39344
SIM006RM	2010-11-22 09:43:33	4.9	4.1	17.7	73.3	0	1.19512
SIM006RM	2010-11-24 10:40:30	48.5	5.4	1.7	44.4	0	8.98148
SIM006RM	2010-12-01 08:53:02	1.2	2.9	20.2	75.7	-0.05	0.413793
SIM006RM	2010-12-03 13:02:12	49.1	4.7	1.6	44.6	0	10.4468
SIM006RM	2010-12-06 14:32:53	46.6	4.4	2.7	46.3	0.01	10.5909
SIM006RM	2010-12-08 11:55:34	29.1	6.4	8.3	56.2	0	4.54688
SIM006RM	2010-12-10 17:36:35	37.7	6.8	5.2	50.3	-0.01	5.54412
SIM006RM	2010-12-15 12:58:55	42.7	6.4	3.3	47.6	0.03	6.67188
SIM006RM	2010-12-24 15:50:25	43.6	5.2	3.5	47.7	-0.02	8.38462
SIM006RM	2010-12-27 13:08:23	30.7	4.3	8.5	56.5	0	7.13953
SIM006RM	2010-12-30 13:15:45	52.5	6.4	0.6	40.5	-0.07	8.20312
SIM006RM	2011-01-07 16:31:18	33.1	5.5	7.6	53.8	0.04	6.01818
SIM006RM	2011-01-14 16:41:51	33.9	5.6	7.1	53.4	0	6.05357
SIM006RM	2011-02-17 08:42:44	54.2	7.4	0.4	38	0	7.32432
SIM006RM	2011-02-21 09:48:59	46.1	6.5	2.8	44.6	0	7.09231
SIM006RM	2011-01-18 14:02:10	42.8	5.4	3.1	48.7	0.05	7.92593
SIM006RM	2011-01-26 13:07:37	50.4	7.8	0.5	41.3	0	6.46154
SIM006RM	2011-04-28 12:44:05	53.8	6.5	0.3	39.4	-0.28	8.27692
SIM006RM	2011-02-22 08:06:35	44.1	8.2	3.2	44.5	0.02	5.37805
SIM006RM	2011-02-28 09:58:09	4	2.1	18.8	75.1	-0.07	1.90476
SIM006RM	2011-03-24 07:20:15	33.5	5.2	7.8	53.5	-0.25	6.44231
SIM006RM	2010-04-29 13:12:12	31.5	4.8	6.8	56.9	25.42	6.5625
SIM006RM	2010-05-13 11:13:28	51.3	4	0.3	44.4	-0.49	12.825
SIM006RM	2010-05-20 12:48:14	50.8	3.9	0	45.3	2.3	13.0256
SIM006RM	2010-04-01 11:08:57	34.6	5.5	5.3	54.6	0.94	6.29091
SIM006RM	2010-04-13 10:47:50	32.9	5.4	5.9	55.8	31.75	6.09259
SIM006RM	2010-04-19 15:51:48	37.6	5.2	4.6	52.6	8.94	7.23077
SIM006RM	2010-04-20 07:49:55	46.2	6.4	1.1	46.3	8.09	7.21875
SIM006RM	2010-08-03 10:12:00	50.9	4.8	0	44.3	12.02	10.6042
SIM006RM	2010-08-12 12:45:00	51.7	4.7	0	43.6	18.81	11
SIM006RM	2010-07-30 10:21:19	50.1	6.2	0	43.7	3.5	8.08065
SIM006RM	2010-07-19 13:30:20	51.1	4.6	0	44.3	2.38	11.1087
SIM006RM	2010-06-18 15:37:44	49.2	6.5	0.1	44.2	12.55	7.56923
SIM006RM	2010-05-21 12:02:24	51	4	0.2	44.8	2.51	12.75
SIM006RM	2010-06-11 08:06:27	51.7	4.5	0	43.8	1.67	11.4889
SIM006RM	2010-06-25 11:19:53	49.9	4.8	0	45.3	12.02	10.3958
SIM006RM	2010-08-27 14:05:25	50.9	6	0	43.1	2.73	8.48333
SIM006RM	2010-08-20 16:13:01	51.9	4.5	0	43.6	2.41	11.5333
SIM006RM	2010-08-25 13:57:18	51	5.3	0	43.7	11.21	9.62264
SIM006RM	2010-08-31 10:05:44	46.9	7.6	1.1	44.4	3.04	6.17105
SIM006RM	2010-08-30 08:53:43	51.1	5.1	0	43.8	2.94	10.0196
SIM006RM	2010-09-07 13:59:16	41.8	6.5	2.9	48.8	28.38	6.43077
SIM006RM	2010-09-09 14:13:20	43.6	6.4	2.6	47.4	17.6	6.8125
SIM006RM	2010-09-17 15:48:00	51.5	6.1	0	42.4	0.54	8.44262
SIM006RM	2010-09-22 14:24:37	52.1	4.9	0	43	26.74	10.6327
SIM006RM	2010-09-27 09:15:23	52	5.3	0	42.7	22.93	9.81132
SIM006RM	2010-09-24 14:00:06	49.7	5.6	0.4	44.3	0.72	8.875
SIM006RM	2010-09-29 09:14:36	51.6	5.5	0	42.9	24.32	9.38182
SIM006RM	2010-10-05 11:24:23	48.4	8.5	0.6	42.5	0.34	5.69412
SIM006RM	2010-10-07 13:10:42	12.1	7.6	14	66.3	14.2	1.59211
SIM006RM	2010-10-11 12:24:10	52.5	4.6	0	42.9	3.88	11.413
SIM006RM	2010-10-12 14:26:48	50.7	7.7	0	41.6	0.62	6.58442
SIM006RM	2010-10-14 14:32:16	49.2	8.5	0	42.3	30.8	5.78824
SIM006RM	2010-10-15 15:57:10	50	9.3	0	40.7	30.3	5.37634
SIM006RM	2010-10-19 08:08:48	54.7	5.3	0	40	3.51	10.3208
SIM006RM	2010-10-20 07:42:42	54.4	4.9	0	40.7	3.46	11.102
SIM006RM	2010-10-25 14:09:59	54.1	4.6	0	41.3	0.23	11.7609
SIM006RM	2010-10-27 08:03:02	53.4	5	0	41.6	-0.61	10.68
SIM006RM	2010-01-27 09:47:56	24	3.3	10.4	62.3	24.47	7.27273
SIM006RM	2010-02-19 10:28:09	37.2	4.7	4.7	53.4	-0.16	7.91489
SIM006RM	2010-03-24 11:48:27	31.6	4.1	7.6	56.7	11.75	7.70732
SIM006RM	2009-11-16 12:41:14	18.5	3.9	11.6	66	-4.48	4.74359
SIM006RM	2009-12-21 09:45:07	22.5	4	10.6	62.9	-2.24	5.625
SIM006RM	2009-10-23 09:01:00	31.1	3.8	5.2	59.9		8.18421
SIM006RM	2009-11-05 16:48:55	42.3	8.2	1	48.5	0.84	5.15854
SIM006RM	2009-09-23 17:43:00	33.3	4	4.6			8.325
SIM006RS	2009-09-23 17:43:00	33.6	5.8	3.8			5.7931
SIM006RS	2009-11-05 16:43:58	15.2	5.9	13	65.9	10.59	2.57627
SIM006RS	2009-11-16 12:30:05	1.6	1	19	78.4	0.4	1.6
SIM006RS	2009-10-23 09:00:00	29.2	1.6	6.8	62.4		18.25
SIM006RS	2009-12-21 09:43:06	39.4	7.7	7.3	45.6	-2.25	5.11688
SIM006RS	2009-11-18 07:36:46	42	6.7	2.1	49.2	-0.75	6.26866
SIM006RS	2010-03-24 11:47:16	29.3	4.5	8.1	58.1	11.74	6.51111
SIM006RS	2010-04-01 11:07:20	41.1	6.5	2.6	49.8	2.01	6.32308
SIM006RS	2010-02-19 10:23:42	45.5	7.6	0.7	46.2	2.2	5.98684
SIM006RS	2010-01-27 09:43:43	21.8	3.2	17.9	57.1	25.38	6.8125
SIM006RS	2010-10-25 14:04:42	51.6	7	0.2	41.2	0.18	7.37143
SIM006RS	2010-10-20 07:38:13	53	7.5	0	39.5	3.48	7.06667
SIM006RS	2010-10-15 15:53:14	50.1	10.1	0	39.8	30.3	4.9604
SIM006RS	2010-10-19 08:03:04	53.4	7.5	0	39.1	3.52	7.12
SIM006RS	2010-10-12 14:23:54	14	6.2	13.1	66.7	0.68	2.25806
SIM006RS	2010-10-14 14:26:52	36.3	9	3	51.7	30.25	4.03333
SIM006RS	2010-10-07 13:04:27	0.1	2.6	20.1	77.2	14.14	0.0384615
SIM006RS	2010-10-11 12:16:37	50.2	6.4	0.1	43.3	0.53	7.84375
SIM006RS	2010-10-05 11:16:10	46.2	10.2	0	43.6	0.39	4.52941
SIM006RS	2010-09-29 09:09:50	48.7	8.2	0	43.1	24.72	5.93902
SIM006RS	2010-09-27 09:09:22	49.2	7.5	0	43.3	22.23	6.56
SIM006RS	2010-09-24 13:56:49	0.4	2.5	18.5	78.6	1.11	0.16
SIM006RS	2010-09-22 14:20:49	50.1	7.4	0	42.5	26.87	6.77027
SIM006RS	2010-09-09 14:11:57	39.9	9.9	1.1	49.1	-15.54	4.0303
SIM006RS	2010-09-14 14:56:04	50.1	8.6	0	41.3	26.11	5.82558
SIM006RS	2010-09-17 15:44:13	51	7.5	0	41.5	0.45	6.8
SIM006RS	2010-09-07 13:57:03	22.8	7.6	8.1	61.5	28.04	3
SIM006RS	2010-08-30 08:49:14	11.3	7.3	12.7	68.7	2.33	1.54795
SIM006RS	2010-08-31 10:01:47	7.6	5.4	14.1	72.9	2.78	1.40741
SIM006RS	2010-08-27 14:02:21	50.1	7.5	0	42.4	2.43	6.68
SIM006RS	2010-08-25 13:52:17	49.1	7.6	0	43.3	11.72	6.46053
SIM006RS	2010-08-20 16:08:19	51.2	6.6	0	42.2	1.9	7.75758
SIM006RS	2010-06-25 11:11:24	48.8	6.8	0	44.4	14.69	7.17647
SIM006RS	2010-06-11 08:00:03	50	6.9	0	43.1	1.94	7.24638
SIM006RS	2010-06-18 15:29:27	47	8	0	45	12.47	5.875
SIM006RS	2010-07-19 13:24:38	48.7	6.8	0	44.5	2.86	7.16176
SIM006RS	2010-07-30 10:15:20	48.3	8.6	0	43.1	4.02	5.61628
SIM006RS	2010-08-03 09:58:00	48.6	6.8	0	44.6	2.34	7.14706
SIM006RS	2010-04-19 15:49:35	43.3	6.8	1.7	48.2	8.32	6.36765
SIM006RS	2010-04-20 07:38:07	46.1	8.5	0.5	44.9	9.24	5.42353
SIM006RS	2010-04-13 10:45:24	35	6.6	4.5	53.9	31.41	5.30303
SIM006RS	2010-05-13 11:07:02	48.8	6.5	0.4	44.3	-0.15	7.50769
SIM006RS	2010-05-20 12:40:40	48	7	0.1	44.9	2.16	6.85714
SIM006RS	2010-04-29 13:05:22	38.7	6.3	3.6	51.4	26.94	6.14286
SIM006RS	2010-05-21 11:54:59	48.8	6.6	0.2	44.4	2.56	7.39394
SIM006RS	2011-02-22 07:57:52	43.6	8.6	3.3	44.5	0.02	5.06977
SIM006RS	2011-02-28 09:51:02	0	0.8	20.4	78.8	0	0
SIM006RS	2011-04-28 12:37:26	53.3	7.5	0.2	39	-0.16	7.10667
SIM006RS	2011-03-24 07:14:59	41	7.8	4.4	46.8	-0.27	5.25641
SIM006RS	2011-01-26 12:55:19	6	6.1	16.9	71	0	0.983607
SIM006RS	2011-01-18 13:58:13	51.6	6.4	0.3	41.7	0.01	8.0625
SIM006RS	2011-02-21 09:44:45	22.9	4.8	11.3	61	0	4.77083
SIM006RS	2011-02-17 08:35:34	53.5	7.8	0.1	38.6	-0.05	6.85897
SIM006RS	2011-01-14 16:35:12	42.1	7.8	3.6	46.5	0.01	5.39744
SIM006RS	2010-12-30 13:06:42	52	7.1	0.3	40.6	-0.04	7.32394
SIM006RS	2011-01-07 16:28:03	49.5	7.2	1.2	42.1	0.03	6.875
SIM006RS	2010-12-27 12:57:39	17.6	4.2	12.9	65.3	0	4.19048
SIM006RS	2010-12-24 15:48:27	6.5	1.7	17.6	74.2	-0.03	3.82353
SIM006RS	2010-12-15 12:56:38	46.5	7.6	1.7	44.2	0	6.11842
SIM006RS	2010-12-10 17:33:51	50.4	7.9	0.6	41.1	-0.02	6.37975
SIM006RS	2010-12-08 11:50:51	39.5	8.5	3.8	48.2	0	4.64706
SIM006RS	2010-12-06 14:30:12	0.4	2	20.1	77.5	0.01	0.2
SIM006RS	2010-12-03 12:54:59	48.3	6.8	1.4	43.5	0.01	7.10294
SIM006RS	2010-12-01 08:54:10	8.2	1.6	20.8	69.4	-0.05	5.125
SIM006RS	2010-12-01 08:55:00	4.1	1.2	20.6	74.1	0	3.41667
SIM006RS	2010-11-24 10:33:14	44.8	7.2	2.5	45.5	0	6.22222
SIM006RS	2010-11-22 09:37:56	0	1.5	20.2	78.3	0	0
SIM006RS	2010-11-19 16:51:20	51.2	7.4	0.3	41.1	0.01	6.91892
SIM006RS	2010-11-17 09:03:26	50.4	7.7	0	41.9	0.29	6.54545
SIM006RS	2010-11-29 11:13:27	0.1	1.1	20.3	78.5	0	0.0909091
SIM006RS	2010-11-15 17:22:47	49.9	6.8	1.1	42.2	0	7.33824
SIM006RS	2010-11-12 09:49:15	0.1	0.4	19.7	79.8	0	0.25
SIM006RS	2010-11-08 09:51:53	40.4	7.1	3.8	48.7	0	5.69014
SIM006RS	2010-11-03 14:32:34	0	0	20.5	79.5	0.19	#DIV/0!
SIM006RS	2010-11-10 08:43:51	1.8	0.3	20.1	77.8	0	6
SIM006RS	2010-11-05 14:09:01	28.8	2.2	8.5	60.5	0.11	13.0909
SIM006RS	2010-11-04 08:36:43	0	0	20.5	79.5	-0.01	#DIV/0!
SIM006RS	2010-11-03 08:13:03	0	0	20.8	79.2	-0.02	#DIV/0!
SIM006RS	2010-11-02 09:41:54	0.2	0.5	20.3	79	-1.34	0.4
SIM006RS	2010-10-28 13:10:29	1.8	2.9	17.5	77.8	0.16	0.62069
SIM006RS	2010-10-29 08:33:03	0	0.1	21.1	78.8	0	0
SIM006RS	2010-10-29 08:07:29	0	0.1	21	78.9	-0.01	0
SIM006RS	2010-10-28 13:21:04	0	0.8	20	79.2	-0.37	0
SIM006RS	2010-10-27 07:58:58	21	7.4	10.3	61.3	-0.6	2.83784
SIM006RS	2010-10-28 14:39:24	0	0.5	20.9	78.6	0.01	0
SIM006RS	2011-10-26 08:57:32	58	9.7	0	32.3	0	5.97938
SIM006RS	2011-09-26 09:09:14	56.5	8.7	0	34.8	0	6.49425
SIM006RS	2011-08-08 08:17:44	57	8.7	0	34.3	-0.45	6.55172
SIM006RS	2011-07-25 08:17:50	49.7	10.1	0	40.2	0.03	4.92079
SIM006RS	2011-06-24 06:38:56	56.3	9.7	0	34	0	5.80412
SIM006RS	2011-05-12 08:16:08	5	7.2	14.6	73.2	0.97	0.694444
SIM006RS	2011-11-29 09:00:07	51.8	8.1	0.9	39.2	-0.02	6.39506
SIM006RS	2011-12-19 09:26:22	51.4	8.7	1.3	38.6	-0.14	5.90805
SIM007RM	2011-12-19 09:11:43	66	4.5	0	29.5	-0.03	14.6667
SIM007RM	2011-05-12 08:54:15	56.7	2.4	0.4	40.5	1.02	23.625
SIM007RM	2011-06-24 09:20:24	59.3	2.9	0	37.8	0.2	20.4483
SIM007RM	2011-07-25 08:09:45	60.4	3.1	0	36.5	0	19.4839
SIM007RM	2011-08-08 08:07:06	62.1	3.2	0	34.7	-5.59	19.4062
SIM007RM	2011-09-26 09:27:52	62.9	3.4	0	33.7	-0.45	18.5
SIM007RM	2011-11-29 08:14:15	49.4	3.8	0	46.8	0.48	13
SIM007RM	2011-10-26 09:25:33	63.9	3.4	0	32.7	0.08	18.7941
SIM007RM	2010-10-27 08:24:49	49.8	1.6	0	48.6	0.34	31.125
SIM007RM	2010-10-28 15:02:21	50.6	1.4	0.1	47.9	0.32	36.1429
SIM007RM	2010-10-29 16:10:44	50.9	1.9	0	47.2	0.75	26.7895
SIM007RM	2010-11-02 10:11:07	51.6	1.6	0	46.8	-0.3	32.25
SIM007RM	2010-11-03 08:30:13	0	0	20.8	79.2	-1.88	#DIV/0!
SIM007RM	2010-11-05 14:12:19	56.2	1.8	0.2	41.8	0.8	31.2222
SIM007RM	2010-11-05 14:12:39	56.2	1.8	0.3	41.7	0.11	31.2222
SIM007RM	2010-11-08 09:55:08	54.1	1.8	0	44.1	0.59	30.0556
SIM007RM	2010-11-10 09:01:17	54.3	2.3	0	43.4	-0.93	23.6087
SIM007RM	2010-11-12 10:00:09	0.3	0	20.4	79.3	-2.58	#DIV/0!
SIM007RM	2010-11-15 17:32:50	50.9	1.8	0.1	47.2	2.44	28.2778
SIM007RM	2010-11-29 11:42:15	51.9	2	0	46.1	-1.23	25.95
SIM007RM	2010-11-17 09:30:42	51.2	1.9	0	46.9	-3.83	26.9474
SIM007RM	2010-11-19 17:04:49	51.4	1.9	0	46.7	1.34	27.0526
SIM007RM	2010-11-22 09:53:46	51.6	1.9	0	46.5	-0.37	27.1579
SIM007RM	2010-11-24 10:58:32	51.4	1.9	0	46.7	0.84	27.0526
SIM007RM	2010-12-01 08:57:47	0	0.1	21	78.9	0.65	0
SIM007RM	2010-12-03 13:23:44	49	1.9	0	49.1	3.22	25.7895
SIM007RM	2010-12-06 14:41:02	36.9	1.3	5.5	56.3	0	28.3846
SIM007RM	2010-12-08 12:03:56	49.8	1.9	0	48.3	0.5	26.2105
SIM007RM	2010-12-10 17:45:27	51.4	1.9	0	46.7	1.76	27.0526
SIM007RM	2010-12-15 13:06:21	50.7	2.2	0	47.1	3.49	23.0455
SIM007RM	2010-12-24 16:03:32	0	0	20.8	79.2	-0.56	#DIV/0!
SIM007RM	2010-12-27 13:15:22	1.1	0	20.2	78.7	-0.01	#DIV/0!
SIM007RM	2010-12-30 14:04:45	52.7	2.1	0	45.2	4.04	25.0952
SIM007RM	2011-01-07 16:38:45	50.7	2.2	0	47.1	2.62	23.0455
SIM007RM	2011-01-14 16:57:32	50.3	2.1	0	47.6	0.78	23.9524
SIM007RM	2011-01-26 13:39:45	53.6	2.1	0	44.3	0.08	25.5238
SIM007RM	2011-02-21 10:01:41	55.1	2.3	0	42.6	0.5	23.9565
SIM007RM	2011-02-22 07:41:20	60.1	3.2	0	36.7	0.04	18.7812
SIM007RM	2011-04-28 13:00:27	56.2	2.1	0.1	41.6	0.92	26.7619
SIM007RM	2011-03-24 07:51:03	57.4	2.8	0	39.8	0.44	20.5
SIM007RM	2011-02-28 10:55:29	3	0.1	19.7	77.2	-1.71	30
SIM007RM	2010-04-29 13:30:18	38.5	0.1	0	61.4	27.41	385
SIM007RM	2010-05-13 11:51:54	42.4	0.1	0	57.5	-2.06	424
SIM007RM	2010-05-20 13:41:49	41.8	0.2	0	58	2.48	209
SIM007RM	2010-04-16 17:14:12	33.2	0.1	1.3	65.4	32.16	332
SIM007RM	2010-04-20 08:40:51	35.7	0.2	0	64.1	9.42	178.5
SIM007RM	2010-08-03 10:28:00	40.6	0.4	0	59	9.42	101.5
SIM007RM	2010-07-30 10:49:06	46	0.6	0.3	53.1	3.96	76.6667
SIM007RM	2010-06-25 11:42:50	45.2	0.4	0	54.4	14.46	113
SIM007RM	2010-06-30 07:12:34	0	0.1	20.7	79.2	14.04	0
SIM007RM	2010-07-19 14:13:25	47	0.5	0	52.5	3.76	94
SIM007RM	2010-06-18 16:00:38	45	0.4	0	54.6	13.13	112.5
SIM007RM	2010-05-21 12:22:14	42.7	0.2	0	57.1	2.17	213.5
SIM007RM	2010-06-11 08:44:05	44.5	0.5	0	55	0.49	89
SIM007RM	2010-08-12 13:50:21	47.3	0.7	0	52	19.73	67.5714
SIM007RM	2010-08-20 16:34:22	48.3	0.8	0	50.9	-0.41	60.375
SIM007RM	2010-08-27 14:18:54	48.1	0.9	0	51	3.04	53.4444
SIM007RM	2010-08-31 10:25:39	47.9	1.3	0.1	50.7	2.35	36.8462
SIM007RM	2010-08-30 09:10:35	47.6	1	0	51.4	2.37	47.6
SIM007RM	2010-09-07 14:21:35	48.6	1.1	0	50.3	28.07	44.1818
SIM007RM	2010-09-14 15:15:30	49.9	1	0	49.1	26.8	49.9
SIM007RM	2010-09-09 14:24:06	48.2	1.1	0	50.7	18.38	43.8182
SIM007RM	2010-09-17 16:01:24	49	1.2	0	49.8	0.38	40.8333
SIM007RM	2010-09-22 14:40:39	49.3	1.3	0	49.4	27.4	37.9231
SIM007RM	2010-09-24 14:13:44	39.5	0.8	3.4	56.3	0.42	49.375
SIM007RM	2010-09-27 09:28:18	48.8	1.2	0	50	25.33	40.6667
SIM007RM	2010-10-05 11:42:24	44.8	1.4	2	51.8	0.51	32
SIM007RM	2010-09-29 09:31:50	49.5	1.2	0	49.3	24.73	41.25
SIM007RM	2010-10-11 12:41:09	46.2	1.2	0	52.6	4.75	38.5
SIM007RM	2010-10-07 15:16:28	0	0	20.8	79.2	3.51	#DIV/0!
SIM007RM	2010-10-14 14:51:55	47.3	1.3	0	51.4	31.09	36.3846
SIM007RM	2010-10-15 16:09:54	48.5	1.5	0	50	31.5	32.3333
SIM007RM	2010-10-19 08:26:42	49.6	1.7	0	48.7	5.81	29.1765
SIM007RM	2010-10-25 14:27:11	51.3	1.4	0	47.3	3.29	36.6429
SIM007RM	2010-01-27 09:29:45	9.4	0.4	17.8	72.4	21.31	23.5
SIM007RM	2010-02-19 10:01:17	24.3	0.2	5.1	70.4	-0.61	121.5
SIM007RM	2010-04-01 10:51:41	17.2	0.1	9.2	73.5	1.59	172
SIM007RM	2010-03-24 12:17:10	2.3	0	18.9	78.8	11.74	#DIV/0!
SIM007RM	2009-11-18 07:21:17	24.8	0.1	0	75.1	-5.46	248
SIM007RM	2009-12-21 09:27:46	33.1	0.1	7.1	59.7	-2.21	331
SIM007RM	2009-10-23 08:58:00	20.2	1.8	6.2	71.8		11.2222
SIM007RM	2009-11-16 12:12:55	22.5	0.2	7.5	69.8	-4.87	112.5
SIM007RM	2009-11-05 16:56:29	23.8	0.1	1.5	74.6	10.59	238
SIM007RM	2009-09-23 17:46:00	22.5	1.3	5.1			17.3077
SIM007RS	2011-08-08 08:05:00	0.1	9.5	6.8	83.6	0	0.0105263
SIM007RS	2011-09-26 09:26:14	0	6.9	10.9	82.2	0.01	0
SIM007RS	2011-10-26 09:23:01	0	5.8	11.1	83.1	0	0
SIM007RS	2011-12-19 09:09:12	48.8	6.1	0	45.1	-0.07	8
SIM007RS	2011-11-29 08:11:29	2.1	5.1	10.8	82	-0.05	0.411765
SIM007RS	2010-11-29 15:25:44	0	3	12.7	84.3	0	0
SIM007RS	2010-12-30 14:02:57	0.1	3.2	7.4	89.3	1.28	0.03125
SIM007RS	2011-03-24 07:49:07	0	3.8	2.5	93.7	0.04	0
SIM007RS	2011-01-26 13:36:58	0	3	3.2	93.8	0.02	0
SIM007RS	2011-02-22 07:38:45	0	4.1	0.5	95.4	-1.56	0
SIM007RS	2011-04-28 12:58:04	0	3.5	3.3	93.2	-0.18	0
SIM007RS	2011-05-12 08:50:31	0.2	5.1	3.8	90.9	-0.03	0.0392157
SIM007RS	2011-06-24 09:19:12	0.1	8.2	2.7	89	0	0.0121951
SIM007RS	2011-07-25 08:04:59	0	9.6	4.1	86.3	0	0
SIM007RS	2010-06-18 15:59:03	0.2	0	13.9	85.9	11.93	#DIV/0!
SIM007RS	2010-06-11 08:42:30	1.6	0	19.7	78.7	2.31	#DIV/0!
SIM007RS	2010-05-21 07:30:07	0	0.1	10	89.9	2.79	0
SIM007RS	2010-08-03 10:21:00	0.2	0	10.2	89.6	11.56	#DIV/0!
SIM007RS	2010-07-30 10:47:29	0	0	11.7	88.3	3.66	#DIV/0!
SIM007RS	2010-06-25 07:10:24	0	0.1	13.3	86.6	14.51	0
SIM007RS	2010-07-19 14:12:11	0.3	0	10.4	89.3	2.23	#DIV/0!
SIM007RS	2010-08-30 08:07:26	0	2.1	13.2	84.7	2.45	0
SIM007RS	2010-08-27 14:17:24	0.2	1.6	13.2	85	2.44	0.125
SIM007RS	2010-08-20 16:32:35	0.2	0.9	12.2	86.7	2.13	0.222222
SIM007RS	2010-08-12 13:47:53	0	0.4	11.9	87.7	18.8	0
SIM007RS	2010-10-15 16:08:09	0.1	3.5	13.6	82.8	30.27	0.0285714
SIM007RS	2010-10-27 08:21:40	0.1	3.4	13.3	83.2	-0.56	0.0294118
SIM007RS	2010-09-29 09:30:04	0.2	2.8	14.1	82.9	24.01	0.0714286
SIM007RS	2010-10-28 14:59:57	0.1	3.1	12.8	84	0	0.0322581
SIM007RS	2010-11-10 08:59:19	0	3.5	12.1	84.4	0.01	0
SIM007RS	2010-01-27 09:26:55	3.4	0.3	17.5	78.8	22.18	11.3333
SIM007RS	2010-02-19 09:58:20	35.1	0.1	0.6	64.2	2.56	351
SIM007RS	2010-04-01 10:50:07	0.1	0.1	17.2	82.6	1.74	1
SIM007RS	2010-03-24 12:15:35	2.9	0	18.7	78.4	11.04	#DIV/0!
SIM007RS	2010-04-29 13:28:10	0	0	12.8	87.2	27.52	#DIV/0!
SIM007RS	2010-05-13 11:50:23	0	0	10.3	89.7	0.23	#DIV/0!
SIM007RS	2010-05-20 13:40:17	0	0	10.5	89.5	2.4	#DIV/0!
SIM007RS	2010-04-16 17:12:48	0	0	14.7	85.3	31.12	#DIV/0!
SIM007RS	2010-04-20 08:37:14	0.1	0.1	13.4	86.4	8.07	1
SIM007RS	2009-09-23 17:46:00	0	0	19.5			#DIV/0!
SIM007RS	2009-10-23 08:57:00	0	0	19.6	80.4		#DIV/0!
SIM007RS	2009-11-05 16:54:46	0.5	0.1	20.3	79.1	10.62	5
SIM007RS	2009-11-16 12:09:39	0	0.1	20.2	79.7	-1.92	0
SIM007RS	2009-11-18 07:17:01	24.7	0.1	0	75.2	-0.74	247
SIM007RS	2009-12-21 09:25:31	19.5	0.1	10.3	70.1	-2.22	195
SIM014RD	2009-12-21 10:15:00	1	0	20.4	78.6	-2.24	#DIV/0!
SIM014RD	2009-11-16 14:19:46	2.5	0	20.6	76.9	-1.99	#DIV/0!
SIM014RD	2009-10-23 08:04:00	1.2	0	19.8	79		#DIV/0!
SIM014RD	2009-09-25 13:46:46	1.6	0	18.8	79.6	2.02	#DIV/0!
SIM014RD	2010-03-24 12:46:53	0	0	21.7	78.3	12.3	#DIV/0!
SIM014RD	2010-02-22 07:56:53	0.3	0.1	20.8	78.8	2.13	3
SIM014RD	2010-01-27 10:04:16	0.6	0	20.4	79	24.35	#DIV/0!
SIM014RD	2010-10-28 11:02:08	30.2	0	10.4	59.4	0.14	#DIV/0!
SIM014RD	2010-11-29 12:45:21	31.1	0	10.4	58.5	-0.13	#DIV/0!
SIM014RD	2010-08-30 07:59:37	85.8	0	5.7	8.5	2.55	#DIV/0!
SIM014RD	2010-09-29 08:28:48	38.5	0	8.7	52.8	24.35	#DIV/0!
SIM014RD	2010-06-25 07:29:26	28.8	0	17.9	53.3	14.58	#DIV/0!
SIM014RD	2010-07-30 08:21:09	14.7	0	10	75.3	3.68	#DIV/0!
SIM014RD	2010-05-21 07:51:24	74.7	0	17.1	8.2	2.53	#DIV/0!
SIM014RD	2010-04-29 11:28:56	88.3	0	11.6	0.1	26.47	#DIV/0!
SIM014RD	2010-05-21 11:11:20	42.9	0	16.3	40.8	2.45	#DIV/0!
SIM014RD	2011-06-24 07:15:13	35.7	0	17.8	46.5	-25.81	#DIV/0!
SIM014RD	2011-07-25 09:01:56	41.2	0	9.8	49	0	#DIV/0!
SIM014RD	2011-05-12 05:51:01	52.9	0	6.6	40.5	1.62	#DIV/0!
SIM014RD	2011-04-28 07:53:11	11	0	10.4	78.6	0.35	#DIV/0!
SIM014RD	2011-02-22 08:26:26	34.4	0	6.6	59	-2.28	#DIV/0!
SIM014RD	2011-03-24 07:03:42	74.2	0	15.6	10.2	0.03	#DIV/0!
SIM014RD	2010-12-30 12:54:36	18.3	0	19	62.7	-0.34	#DIV/0!
SIM014RD	2011-01-26 12:10:49	88	0	11.9	0.1	0.08	#DIV/0!
SIM014RD	2011-10-25 10:43:48	24.4	0	9.3	66.3	-0.03	#DIV/0!
SIM014RD	2011-11-29 09:01:40	10.4	0	20.1	69.5	0.22	#DIV/0!
SIM014RD	2011-12-19 09:17:20	13	0	5.3	81.7	0	#DIV/0!
SIM014RD	2011-08-08 09:14:51	29.2	0	15.5	55.3	0.08	#DIV/0!
SIM014RD	2011-09-26 09:01:15	16.1	0	10.6	73.3	-0.13	#DIV/0!
SIM014RM	2011-03-24 07:02:18	40.6	0.1	17.3	42	0.04	406
SIM014RM	2011-02-22 08:25:17	33.8	0.1	16.7	49.4	0.09	338
SIM014RM	2011-04-28 07:51:55	37.8	0	16.9	45.3	0.01	#DIV/0!
SIM014RM	2011-01-26 12:04:37	1	0	20.5	78.5	0	#DIV/0!
SIM014RM	2010-12-30 12:53:32	36.8	0	16.4	46.8	0	#DIV/0!
SIM014RM	2010-11-29 12:44:02	31.1	0	18.4	50.5	-0.03	#DIV/0!
SIM014RM	2010-10-28 11:00:26	21.7	0	18.3	60	0.07	#DIV/0!
SIM014RM	2011-11-29 08:35:46	1.4	0	21.3	77.3	0.16	#DIV/0!
SIM014RM	2011-09-26 08:59:26	69.6	0.1	15.7	14.6	0.06	696
SIM014RM	2011-10-25 10:42:25	7.5	5.9	10.4	76.2	0.05	1.27119
SIM014RM	2011-08-08 09:00:20	1	0	19.6	79.4	0.08	#DIV/0!
SIM014RM	2011-07-25 08:59:51	39.5	0	17.6	42.9	0	#DIV/0!
SIM014RM	2011-06-24 07:21:48	0.9	0	21.4	77.7	0	#DIV/0!
SIM014RM	2011-05-12 05:49:10	39.1	0	17.5	43.4	-0.13	#DIV/0!
SIM014RM	2011-12-19 09:15:19	34.3	0.1	17.4	48.2	-0.08	343
SIM014RM	2009-09-25 13:44:34	0.3	0	19.2	80.5	2.62	#DIV/0!
SIM014RM	2009-10-23 09:03:00	0.2	0.1	19	80.7		2
SIM014RM	2009-12-21 10:11:45	0.9	0	20.3	78.8	-5.32	#DIV/0!
SIM014RM	2009-11-16 14:15:07	0.9	0	20.4	78.7	0.66	#DIV/0!
SIM014RM	2010-03-24 12:45:47	1.7	0	21.4	76.9	11.73	#DIV/0!
SIM014RM	2010-02-22 07:54:27	1.4	0.1	20.9	77.6	-12.54	14
SIM014RM	2010-01-27 10:02:26	1.2	0	20.5	78.3	21.16	#DIV/0!
SIM014RM	2010-09-29 08:25:45	24.2	0	18.2	57.6	24.13	#DIV/0!
SIM014RM	2010-08-30 07:57:28	24.6	0.1	17.7	57.6	1.5	246
SIM014RM	2010-06-25 07:24:45	1.1	0	20.6	78.3	9.92	#DIV/0!
SIM014RM	2010-07-30 08:18:58	24.7	0	18.4	56.9	3.47	#DIV/0!
SIM014RM	2010-04-20 08:12:39	86.5	0.1	13.3	0.1	8.51	865
SIM014RM	2010-04-29 11:25:20	26.8	0	18.2	55	2.93	#DIV/0!
SIM014RM	2010-05-21 07:50:28	1.7	0	20.4	77.9	-19.86	#DIV/0!
SIM06RD1	2010-06-25 11:27:07	48.1	1	0	50.9	14.05	48.1
SIM06RD1	2010-07-19 13:46:42	49.5	0.9	0	49.6	1.67	55
SIM06RD1	2010-07-30 10:31:31	49.6	1.1	0	49.3	3.79	45.0909
SIM06RD1	2010-05-20 12:55:38	46.2	0.9	0.1	52.8	-0.9	51.3333
SIM06RD1	2010-05-21 12:08:55	47.1	0.9	0	52	1.92	52.3333
SIM06RD1	2010-06-11 08:17:54	48.1	1.2	0	50.7	2.35	40.0833
SIM06RD1	2010-06-18 15:44:27	48.1	1	0.2	50.7	13.36	48.1
SIM06RD1	2010-08-03 09:21:00	48	1	0.1	50.9	11.21	48
SIM06RD1	2010-08-12 12:54:57	50.5	1.1	0.1	48.3	18.81	45.9091
SIM06RD1	2010-08-20 16:20:05	51.1	1.2	0	47.7	2.25	42.5833
SIM06RD1	2010-08-25 14:03:58	50.8	1.3	0	47.9	10.92	39.0769
SIM06RD1	2010-08-27 14:09:00	51.1	1.3	0	47.6	2.85	39.3077
SIM06RD1	2010-04-29 13:17:27	38.1	0.9	3.2	57.8	26.79	42.3333
SIM06RD1	2010-05-13 11:24:02	47	0.8	0.2	52	0.48	58.75
SIM06RD1	2010-04-13 10:50:05	33.2	0.9	5.5	60.4	31.64	36.8889
SIM06RD1	2010-04-19 15:53:09	28.4	0.9	8.3	62.4	8.28	31.5556
